1

2

3

4 Oral health-related quality of life in elderly women participating in a  
5 coexistence group in southern Brazil

6

7

8 Oral health and quality of life in elderly women

9

10

11 Thaís Cauduro Dallasta<sup>1</sup>, Vanessa Bischoff Medina<sup>1</sup>, Loiva Beatriz Dallepiane<sup>2\*</sup>

12

13

14

15 <sup>1</sup> Center of Physical Education and Sports, Federal University of Santa Maria,  
16 Santa Maria, Rio Grande do Sul, Brazil.

17 <sup>2</sup> Department of Food and Nutrition, Federal University of Santa Maria, Santa  
18 Maria, Rio Grande do Sul, Brazil.

19

20

21 \*Corresponding author:

22 E-mail: [loiva.dallepiane@hotmail.com](mailto:loiva.dallepiane@hotmail.com) (LBD)

23

## 24 **Abstract**

25           The objective of this work was to evaluate the association between  
26 quality of life with the oral health in elderly women participating in a coexistence  
27 group in Southern Brazil. Study of the descriptive type, analytical, cross-  
28 sectional approach, with women aged 60 years or more, participants of a  
29 coexistence group in a city in Southern Brazil. Data collection used the  
30 instrument Oral Health Impact Profile (OHIP-14). The study had the  
31 participation of 64 elderly women aged between 60 and 88 years old with a  
32 mean of  $69.8 \pm 7.31$  years. The areas that presented the highest values were  
33 "Physical Pain", "Psychological Distress" and "Physical Disability". The highest  
34 averages of the total scores of the OHIP-14 occurred in individuals with lower  
35 family income and low education, who showed signs of depression, changes in  
36 taste, difficulty to feel the taste of certain foods and malnutrition. Low education,  
37 change of taste and malnutrition by the arm circumference were associated with  
38 poor quality of life arising from oral disorders.

## 39 **Introduction**

40           Oral health problems are recognized as important causes of a negative  
41 impact on daily activities, causing pain, suffering, psychological constraints and  
42 social isolation. A decreased perception of oral condition can lead to lack of  
43 daily oral care, need for dental treatment and, consequently, a poor oral health,  
44 affecting quality of life [1].

45           The Brazilian regions present great inequality in the utilization of dental  
46 care and in people's oral health condition if we consider the access to services.  
47 The most vulnerable groups, such as rural populations, elders and poor people,

48 with less schooling, have the worst oral health conditions and face more  
49 obstacles in the use of health services [2-3].

50 The factors associated with the non-utilization of dental services are sex,  
51 race/skin color, schooling, income, health insurance, lack of self-perception of  
52 oral health and absence of teeth. These factors were also associated with not  
53 going to dental consultations for more than 12 months, and other predisposing  
54 characteristics, such as age, social networking, and feeding difficulties by oral  
55 health problems [4].

56 Therefore, the social interaction of the elderly and its influence on oral  
57 health, and, consequently, on their quality of life, become important. In Brazil,  
58 from the concept of active aging, Third Age coexistence groups emerged with  
59 places for social gathering as well as occupation of free time with physical and  
60 leisure activities among the elderly [5]. These activities provide elderly people  
61 integration with a social network with a healthier lifestyle, enabling  
62 improvements in health that hindered activities of daily life, thus influencing in a  
63 better quality of life [6]. These groups are characterized predominantly by  
64 women, following a historic trend in different Brazilian cities, although it is also  
65 open to male participation [7].

66 In this sense, this study aims to assess the association between quality  
67 of life with the oral health in elderly women participating in a coexistence group  
68 in Southern Brazil.

69

## 70 **Methods**

### 71 **Study design and sample**

72           The research was characterized as a study of the descriptive type,  
73 analytical, with cross-sectional approach, involving female individuals aged 60  
74 years or more, participants of a coexistence group in a city in Southern Brazil.

75           Data collection occurred in the period between November and December  
76 2015, at the place of activities of the group, being held in the form of an  
77 interview. The Research Ethics Committee of the Federal University of Santa  
78 Maria - UFSM - approved the research under the opinion number 1,282.020. All  
79 participants signed the Informed Consent Form.

## 80   **Dependent and independent variables**

81           The dependent variable used in this study was the instrument *Oral Health*  
82 *Impact Profile - OHIP-14* -, which lists the aspects of quality of life most affected  
83 by the oral health condition [8].

84           The questionnaire consists of 14 questions, two for each one of the  
85 seven dimensions of oral impact: functional limitation (difficulty in speech and in  
86 the decreased sensitivity of taste); pain (sensation of pain and discomfort in the  
87 act of eating); psychological distress (concern and stress that the oral condition  
88 can cause); physical impairment (possible loss in food and the need to interrupt  
89 meals); psychological impairment (difficulty relaxing and feeling of shame on the  
90 oral condition); social disability (impact of oral condition in relations with others  
91 and the difficulty performing daily activities); and impairment (person's  
92 perception about the impact of the oral condition in his/her life and the inability  
93 to develop his/her daily activities).

94           The questions relate to general oral health problems that people have  
95 experienced in the past 12 months, with options for answers on a scale ranging

96 from zero (never) to four (always). As each domain has two subdomains, the  
97 score ranges from zero to eight in each domain. The severity is measured by  
98 the sum of all scores ranging from zero to 56, since the higher the score the  
99 greater is the impact of oral disorders on quality of life.

100 The independent variables used in this study were sociodemographic  
101 variables (family income and schooling) and health conditions (presence of  
102 depression, use of dental prosthesis, discomfort while using prosthesis, change  
103 in taste, difficulty feeling the food taste and arm circumference).

## 104 **Statistical analysis**

105 The data were analyzed using Stata 13.0, presented descriptively for  
106 sociodemographic and health characteristics, as well as the mean values of the  
107 OHIP-14 scores and their respective domains. The differences between the  
108 average scores of the OHIP-14, according to the sociodemographic and health  
109 variables, were statistically compared by the Mann-Whitney test, adopting a  
110 significance level of 5%. In this study, the scores of the OHIP-14 (outcome)  
111 were considered as counting variables, and simple and multiple Poisson  
112 regression models were used to verify their association with the other predictor  
113 variables. The analysis resulted in the calculation of the means ratio with their  
114 respective confidence intervals (RR; IC95%) as an association measure. The  
115 RR corresponds to the reason of the arithmetic average of the OHIP-14  
116 between different categories of the predictor variables. The construction of  
117 multiple model considered as an entry criterion only the variables that had a p  
118 value less than 0.20 in the simple analysis; and they remained in the final model  
119 when the p value was less than 0.05 after adjustment.

120

## 121 **Results**

122           Sixty-four elderly women participated in the study. The age ranged from  
123 60 to 88 years, with an average of  $69.8 \pm 7.31$  years. Table 1 presents the  
124 sociodemographic characteristics and health conditions of the sample.

125 **Table 1. Sociodemographic characteristics and health conditions.**

| <b>Variables</b>                      | <b>N</b> | <b>%</b> |
|---------------------------------------|----------|----------|
| <b>Family Income (MW)*</b>            |          |          |
| ≤ 3 MW                                | 41       | 64.06    |
| > 3 MW                                | 23       | 35.94    |
| <b>Education (years of study)</b>     |          |          |
| ≥ 5 years                             | 52       | 81.25    |
| < 5 years                             | 12       | 18.75    |
| <b>Depression (self-reported)</b>     |          |          |
| No depression                         | 38       | 80.85    |
| With depression                       | 9        | 19.15    |
| <b>Use of prosthesis</b>              |          |          |
| Yes                                   | 55       | 85.94    |
| No                                    | 9        | 14.06    |
| <b>Discomfort with the prosthesis</b> |          |          |
| Yes                                   | 30       | 53.57    |
| No                                    | 26       | 46.43    |
| <b>Change in taste</b>                |          |          |
|                                       |          |          |

|                                      |    |       |
|--------------------------------------|----|-------|
| No                                   | 49 | 76.56 |
| Yes                                  | 15 | 23.44 |
| <b>Difficulty feeling food taste</b> |    |       |
| No                                   | 53 | 84.13 |
| Yes                                  | 10 | 15.87 |
| <b>Arm circumference</b>             |    |       |
| Depletion                            | 10 | 15.63 |
| Overweight                           | 20 | 31.25 |
| Eutrophy                             | 34 | 53.13 |

126 \*MW=Minimum wage (Brazilian MW value in November 2015 = R\$ 788,00 or its  
 127 corresponding at that time, roughly U\$ 203).

128

129 Table 2 shows the mean values and the variation in the scores of the  
 130 OHIP-14 in the sample. The values for the total scores of the OHIP-14 ranged  
 131 from zero to 28, with an average of 9.78 and standard deviation of 6.66. The  
 132 scores varied widely according to each domain, and there was no ceiling effect  
 133 in the answers. The areas that presented the highest values were "Physical  
 134 pain", "Psychological distress" and "Physical impairment".

**Table 2. Descriptive analysis of the total scores and subdomains of the OHIP-14.**

|                       | <b>Number of questions</b> | <b>Scores meand (SD)</b> | <b>Possible range</b> | <b>Observed range</b> |
|-----------------------|----------------------------|--------------------------|-----------------------|-----------------------|
| OHIP-14 (total score) | 14                         | 9.78 (6.66)              | 0 – 56                | 0 – 28                |
| <b>Subdomains</b>     |                            |                          |                       |                       |
| Functional limitation | 2                          | 1.05 (1.47)              | 0 – 8                 | 0 – 6                 |

|                          |   |             |       |       |
|--------------------------|---|-------------|-------|-------|
| Physical pain            | 2 | 1.98 (1.41) | 0 – 8 | 0 – 6 |
| Psychological discomfort | 2 | 1.83 (1.92) | 0 – 8 | 0 – 6 |
| Physical impairment      | 2 | 1.63 (1.53) | 0 – 8 | 0 – 5 |
| Psychological impairment | 2 | 1.41 (1.45) | 0 – 8 | 0 – 6 |
| Social impairment        | 2 | 1.08 (1.30) | 0 – 8 | 0 – 4 |
| Impairment               | 2 | 0.81 (1.33) | 0 – 8 | 0 – 4 |

135           There was statistically significant difference between the averages of the  
136 total scores and subdomains OHIP-14 according to the health conditions  
137 variables and sociodemographic characteristics (Table 3). The highest means of  
138 the total scores of the OHIP-14 occurred in individuals with lower family income,  
139 low educational attainment, with depressive signs, changes in taste,  
140 malnutrition and with difficulty to feel the taste of certain foods. Education also  
141 associated with OHIP-14 scores in the domains of psychological distress and  
142 physical impairment. Similarly, changes in taste also influenced the fields of  
143 functional limitation and physical impairment. There were similar results  
144 regarding difficulty in feeling the taste of foods, since this variable influenced  
145 negatively the domain functional limitation and psychological impairment.  
146 Malnourished individuals, according to the arm circumference, also had a  
147 worsening of quality of life when compared to individuals with excess weight in  
148 the total scores and in the field of physical impairment.

149



150 **Table 3. Means (standard deviations) of the total scores and subdomains**  
 151 **of the OHIP-14 according to health condition and sociodemographic**  
 152 **variables.**

| Variables                             | OHIP-14         | FL             | PP             | PD              | PI             | PI             | SI              | I              |
|---------------------------------------|-----------------|----------------|----------------|-----------------|----------------|----------------|-----------------|----------------|
| <b>Family income (minimum wage)</b>   |                 |                |                |                 |                |                |                 |                |
| > 3 MW                                | 8.22<br>(5.48)* | 0.87<br>(1.29) | 1.87<br>(1.36) | 1.69<br>(1.79)  | 1.13<br>(1.32) | 1.30<br>(1.26) | 0.78<br>(1.24)  | 0.56<br>(1.16) |
| ≤ 3 MW                                | 10.66<br>(7.15) | 1.15<br>(1.57) | 2.05<br>(1.45) | 1.90<br>(2.01)  | 1.90<br>(1.58) | 1.46<br>(1.57) | 1.24<br>(1.32)  | 0.95<br>(1.41) |
| <b>Education (years of study)</b>     |                 |                |                |                 |                |                |                 |                |
| ≥ 5 years                             | 8.98<br>(6.56)* | 0.98<br>(1.46) | 2.02<br>(1.49) | 1.56<br>(1.89)* | 1.52<br>(1.50) | 1.29<br>(1.40) | 0.92<br>(1.26)* | 0.69<br>(1.24) |
| < 5 years                             | 13.25<br>(6.19) | 1.33<br>(1.56) | 1.83<br>(1.03) | 3.00<br>(1.65)  | 2.08<br>(1.62) | 1.92<br>(1.62) | 1.75<br>(1.29)  | 1.33<br>(1.61) |
| <b>Depression (self-reported)</b>     |                 |                |                |                 |                |                |                 |                |
| Yes                                   | 8.74<br>(5.63)* | 1.00<br>(1.45) | 1.89<br>(1.41) | 1.68<br>(1.97)  | 1.42<br>(1.52) | 1.21<br>(1.21) | 0.82<br>(1.06)  | 0.71<br>(1.23) |
| No                                    | 11.78<br>(9.02) | 1.33<br>(2.06) | 1.56<br>(1.33) | 2.78<br>(2.11)  | 1.55<br>(1.74) | 2.33<br>(1.94) | 1.44<br>(1.33)  | 0.78<br>(1.39) |
| <b>Use of dental prosthesis</b>       |                 |                |                |                 |                |                |                 |                |
| Yes                                   | 8.89<br>(6.60)  | 0.55<br>(0.88) | 2.56<br>(1.24) | 1.78<br>(1.64)  | 1.33<br>(1.32) | 1.44<br>(1.74) | 0.67<br>(1.41)  | 0.55<br>(1.13) |
| No                                    | 9.92<br>(6.72)  | 1.13<br>(1.54) | 1.89<br>(1.42) | 1.84<br>(1.98)  | 1.67<br>(1.56) | 1.40<br>(1.42) | 1.14<br>(1.28)  | 0.85<br>(1.37) |
| <b>Discomfort with the prosthesis</b> |                 |                |                |                 |                |                |                 |                |

|     |                 |                |                |                |                |                |                |                |
|-----|-----------------|----------------|----------------|----------------|----------------|----------------|----------------|----------------|
| Yes | 10.73<br>(7.12) | 1.30<br>(1.66) | 2.00<br>(1.46) | 1.90<br>(1.83) | 1.80<br>(1.49) | 1.60<br>(1.45) | 1.33<br>(1.32) | 0.80<br>(1.40) |
| No  | 8.23<br>(5.95)  | 0.73<br>(1.22) | 1.69<br>(1.35) | 1.73<br>(2.20) | 1.35<br>(1.65) | 1.08<br>(1.35) | 0.85<br>(1.22) | 0.81<br>(1.33) |

**Change in taste**

|     |                 |                 |                |                |                 |                |                |                |
|-----|-----------------|-----------------|----------------|----------------|-----------------|----------------|----------------|----------------|
| No  | 8.43<br>(5.17)* | 0.69<br>(1.17)* | 1.86<br>(1.32) | 1.73<br>(1.81) | 1.39<br>(1.48)* | 1.16<br>(1.16) | 0.92<br>(1.13) | 0.67<br>(1.25) |
| Yes | 14.20<br>(8.98) | 2.2<br>(1.78)   | 2.4<br>(1.64)  | 2.13<br>(2.29) | 2.40<br>(1.45)  | 2.20<br>(2.01) | 1.60<br>(1.68) | 1.27<br>(1.53) |

**Difficulty feeling food tastes**

|     |                 |                 |                |                |                |                 |                |                |
|-----|-----------------|-----------------|----------------|----------------|----------------|-----------------|----------------|----------------|
| No  | 9.04<br>(5.90)* | 0.75<br>(1.19)* | 1.92<br>(1.37) | 1.87<br>(1.94) | 1.47<br>(1.47) | 1.21<br>(1.31)* | 1.06<br>(1.25) | 0.75<br>(1.27) |
| Yes | 13.90<br>(9.31) | 2.7<br>(1.83)   | 2.10<br>(1.59) | 1.80<br>(1.93) | 2.40<br>(1.71) | 2.40<br>(1.90)  | 1.30<br>(1.64) | 1.20<br>(1.68) |

**Arm circumference**

|              |                 |                |                |                |                 |                |                |                |
|--------------|-----------------|----------------|----------------|----------------|-----------------|----------------|----------------|----------------|
| Malnutrition | 10.80<br>(6.81) | 0.80<br>(1.14) | 2.80<br>(1.47) | 1.60<br>(1.58) | 2.00<br>(1.24)  | 1.30<br>(1.64) | 1.40<br>(1.64) | 0.90<br>(1.28) |
| Overweight   | 7.25<br>(5.86)* | 0.85<br>(1.56) | 1.70<br>(1.52) | 1.55<br>(1.84) | 0.85<br>(1.27)* | 1.00<br>(1.34) | 0.65<br>(0.88) | 0.65<br>(1.22) |
| Eutrophy     | 10.97<br>(6.82) | 1.23<br>(1.52) | 1.91<br>(1.26) | 2.06<br>(2.07) | 1.97<br>(1.60)  | 1.67<br>(1.45) | 1.24<br>(1.37) | 0.88<br>(1.43) |

153 Source (OHIP-14: Total scores; FL: Functional limitation; PP: Physical pain; PD:

154 Psychological Distress; PI: Physical impairment; PI: Psychological impairment; SI:

155 Social impairment; I: Impairment)

156 \*p value  $\leq 0.05$ : Mann-Whitney test. Arm circumference variable: p value of the

157 Kruskal-Wallis test.

158

159 Table 4 presents the results of the simple and adjusted Poisson  
 160 regression models. The simple analysis showed that only the variables "use of  
 161 prosthesis and discomfort while using prosthesis" were not associated with the  
 162 outcome. After adjustment, the variables "educational attainment, change in  
 163 taste and arm circumference" remained statistically associated to the total score  
 164 means of the OHIP-14. For example, individuals who had less than five years of  
 165 study presented a OHIP-14 mean 1.67 times greater when compared to  
 166 individuals who had five or more years of study (RR: 1.67; 95% IC: 1.29-2.16).  
 167 In the same way, subjects with change of taste and malnutrition presented  
 168 worse levels of quality of life related to oral health (i.e. higher OHIP-14 means),  
 169 when compared to subjects without these changes.

170

171 **Table 4. Association between health condition and sociodemographic**  
 172 **variables with OHIP-14 means. Simple and Adjusted Poisson Regression**  
 173 **Models.**

| <b>Variables</b>                                 | <b>RR<sup>a</sup> (95%CI)</b> | <b>P</b> | <b>RR<sup>b</sup> (95%CI)</b> | <b>p</b> |
|--------------------------------------------------|-------------------------------|----------|-------------------------------|----------|
| <b>Family income</b><br><b>(MW=minimum wage)</b> |                               |          | *                             |          |
| > 3 MW                                           | 1                             |          |                               |          |
| ≤ 3 MW                                           | 1.29 (1.09-1.53)              | 0.03     |                               |          |
| <b>Education (years of study)</b>                |                               |          |                               |          |
| ≥ 5 years                                        | 1                             |          | 1                             |          |
| < 5 years                                        | 1.47 (1.23-1.77)              | <0.01    | 1.36 (1.13-1.64)              | 0.01     |
| <b>Depression</b>                                |                               |          | *                             |          |

|                                       |                  |       |                  |       |
|---------------------------------------|------------------|-------|------------------|-------|
| No depression                         | 1                |       |                  |       |
| With depression                       | 1.35 (1.08-1.68) | <0.01 |                  |       |
| <b>Use of dental prosthesis</b>       |                  |       | <b>**</b>        |       |
| Yes                                   | 1                |       |                  |       |
| No                                    | 1.12 (0.88-1.41) | 0.36  |                  |       |
| <b>Discomfort with the prosthesis</b> |                  |       | <b>*</b>         |       |
| Yes                                   | 1                |       |                  |       |
| No                                    | 0.77 (0.65-1.01) | 0.06  |                  |       |
| <b>Change in taste</b>                |                  |       |                  |       |
| No                                    | 1                |       | 1                |       |
| Yes                                   | 1.68 (1.43-1.99) | <0.01 | 1.72 (1.45-2.05) | <0.01 |
| <b>Difficulty feeling food tastes</b> |                  |       | <b>*</b>         |       |
| No                                    | 1                |       |                  |       |
| Yes                                   | 1.54 (1.27-1.85) | <0.01 |                  |       |
| <b>Arm circumference</b>              |                  |       |                  |       |
| Malnutrition                          |                  |       | 1                |       |
| Overweight                            | 0.67 (0.52-0.87) | <0.01 | 0.92 (0.74-1.14) | 0.41  |
| Eutrophy                              | 1.01 (0.81-1.26) | 0.90  | 0.62 (0.48-0.80) | <0.01 |

174 RR<sup>a</sup>: Means ratio of the non-adjusted model; RR<sup>b</sup>: Means ratio of the adjusted

175 model for all variables.

176 \* Variables excluded from the final model for losing significance after

177 adjustment.

178 \*\* Variable use of prosthesis was not included in the multiple model for

179 presenting p>0.20 in the non-adjusted analysis.

180

## 181 **Discussion**

182         This study evaluated the aspects of quality of life most affected by the  
183 oral health condition in elderly women participating in a coexistence group in  
184 Southern Brazil. The main result of this study is that individuals with less  
185 schooling (< 5 years), change in taste and malnutrition, as assessed by the arm  
186 circumference, presented the worst levels of quality of life associated with oral  
187 health.

188         Investigating people's perception and position on their health problems is  
189 important, because it allows determining the social, cultural and economic  
190 influence in their quality of life. The self-perception in oral health, assessed by  
191 means of the Oral Health Impact Profile (OHIP-14) using multilevel analysis,  
192 identified that individuals of the female sex, with advanced age, worst scores of  
193 quality of life and social support, with bad habits, smokers and residents in low-  
194 income places, were more likely to report worse self-perceived oral health [9].

195         The low schooling compromises the understanding of the concept of oral  
196 health as part of overall health. In a study, the prevalence of edentulism, use,  
197 need and replacement of dental prosthesis showed a precarious condition of  
198 elderly respondents, although reporting a great or good perception of their oral  
199 health [10].

200         Changes in taste influenced the domains of functional limitation and  
201 physical impairment. More healthy oral conditions contribute to a better  
202 perception of flavor, and may stimulate appetite and, consequently, increase  
203 caloric intake; this can help prevent nutritional deficiency in elders and improve  
204 the overall health and quality of life of these patients [11].

205           The changes of taste among elders with physical impairment can be  
206 explained by their common use of dental prostheses, which changes the  
207 chewing function, decreasing the strength to crush and, with it, hindering the  
208 bite of food, considering that natural teeth have no longer the same  
209 performance [12]. These factors can lead the elderly person to lose his/her  
210 desire to eat, chew (due to early fatigue) and pleasure while eating. Faced with  
211 these situations, elders realize that chewing is no longer easy and comfortable,  
212 and that there is a need to select the food type or their way to consume it.

213           According to the findings in this study, the relationship of malnutrition with  
214 worse scores in OHIP-14 occurs because malnutrition in elders has an obvious  
215 impact on their overall health and quality of life.

216           In this study, the sense of physical pain, psychological distress and  
217 physical impairment were associated with oral disorders and, consequently, to a  
218 worse quality of life. In another study, the elders that showed greater severity of  
219 OHIP-14 also showed greater impairment of mental domain (depression) and  
220 quality of life. Oral health, one of the components of quality of life, refers to the  
221 individual's subjective experience on his/her functional, social and psychological  
222 well-being [13].

223           Changes in the psychological aspect, such as depression, social isolation  
224 and loneliness, weaken the elder, causing disinterest for activities of daily life  
225 and affecting food consumption, which may motivate a growing disinterest in the  
226 face of more consistent healthy foods, which causes, therefore, the installation  
227 of inadequate dietary habits, characterized by the intake of foods with a  
228 smoother texture and, at the same time, poor in nutrients. This gives the  
229 appearance of nutritional deficiencies that impair the functioning of various

230 organs, affecting their health and contributing to a worse quality of life [13].

231 All elderly patients evaluated in this study had no cognitive deficit, and  
232 this may be associated to their participation in coexistence groups characterized  
233 by several stimuli, motivated by the coexistence with other elderly people with  
234 cognitive demands to develop their capacities. In another study, the  
235 participation of the elderly population in coexistence groups has proved to be a  
236 good occupational therapeutic resource for health prevention and promotion, as  
237 well as a possibility of early cognitive intervention with these subjects [14].

238 Regarding the aspects related to the individual dimension, all individuals  
239 in the study were female, which may represent a limitation to possible  
240 inferences or generalizations for the whole population. Women are more linked  
241 to the care act (personal and family), thus seeking more health services and  
242 reporting more morbidities [1].

243 Another study found no statistically significant differences between men  
244 and women regarding the scores obtained in the OHIP-14, and women showed  
245 higher levels, especially in the dimensions of physical impairment and  
246 psychological distress. This implies that, if the search was performed including  
247 elderly men, the results could be different [15].

248 During several generations, women played a cultural role of responsibility  
249 with family care, and, therefore, are more attentive and concerned with their oral  
250 health, while, at the same time, they feel a greater need to consult their doctor  
251 regarding any change, thus preventing its progression [16].

252 Elders' participation in coexistence groups is important, incorporating a  
253 social network, allowing them greater satisfaction with life. The improvements  
254 relate to health issues, stating that, before attending the groups, they frequently

255 had headaches that prevented them from performing common activities of daily  
256 life [6].

257 Thus, the activities offered by the groups helped the elders in this study  
258 to acquire a healthier lifestyle and, consequently, improve their quality of life.

259 Among the limitations of this research, its cross-sectional design stands  
260 out, not allowing establishing cause and effect relationships between associated  
261 factors. Nevertheless, the presented results are valid and representative of the  
262 investigated elderly population, allowing more clarification about the quality of  
263 life related to elders' oral health. The assessment of quality of life is a dynamic  
264 process, and possible associated factors can modify throughout time. Another  
265 limitation of the study was the non-completion of clinical assessment to verify  
266 the oral situation of the elderly interviewees. Such limitations are some starting  
267 points for future researches to fill these gaps.

268

## 269 **Conclusion**

270 Low schooling, change of taste and malnutrition by the arm  
271 circumference were associated with poor quality of life arising from oral  
272 disorders.

273

## 274 **Acknowledgements**

275 We would like to thank the Postgraduate Program in Gerontology of the  
276 UFSM and to the elderly members of the coexistence group "*Alegria de Viver*"  
277 by their receptiveness and availability to participate in our research.

278

279



## 280 **References**

- 281 1. Gabardo MCL, Moysés ST, Moysés S. Autopercepção de saúde bucal  
282 conforme o Perfil de Impacto da Saúde Bucal (OHIP) e fatores  
283 associados: revisão sistemática. *Rev Panam Salud Pública*. 2013; 33(  
284 6): 439-445.
- 285 2. Boccolini CS, de Souza Junior PR. Inequities in Healthcare utilization:  
286 results of the Brazilian National Health Survey, 2013. *Int J Equity Health*.  
287 2016 Nov; 15(1):150. Available from: [https://doi.org/10.1186/s12939-016-](https://doi.org/10.1186/s12939-016-0444-3)  
288 0444-3. PMID: 27852269.
- 289 3. Mullachery P, Silver D, Macinko J. Changes in health care inequity in  
290 Brazil between 2008 and 2013. *Int J Equity Health*. 2016; 15(1):140.  
291 Available from: <https://doi.org/10.1186/s12939-016-0431-8>. PMID:  
292 27852309.
- 293 4. Herkrath FJ, Vettore MV, Werneck GL. Contextual and individual factors  
294 associated with dental services utilisation by Brazilian adults: A multilevel  
295 analysis. *PLoS ONE*. 2018 13(2): e0192771. Available from:  
296 <https://doi.org/10.1371/journal.pone.0192771>.
- 297 5. Vargas AC, Portella MR. O diferencial de um grupo de convivência:  
298 equilíbrio e proporcionalidade entre os gêneros. *Rev Kairós*. 2013;16(3):  
299 227-238.
- 300 6. Wichmann FM, Couto ANC, Areosa SVC, Montañés MC. Grupos de  
301 convivência como suporte ao idoso na melhoria da saúde. *Rev Bras*  
302 *Geriatr Gerontol*. 2013; 16(4):821-832.
- 303 7. Santos PM, Marinho, Marinho A. Grupos de convivência para idosos  
304 como espaços de lazer (também) para homens: o olhar dos

- 305 coordenadores em Florianópolis (SC). *Motrivivência*. 2016 May; 28(47):  
306 128-144.
- 307 8. Slade GD. Derivation and validation of a Short-Form Oral Health Impact  
308 Profile. *Community Dent Oral Epidemiol*. 1997; 25: 284-290.
- 309 9. Gabardo MCL, Moysés J, Moysés ST, Olandoski M, Olinto MTA, Pattussi  
310 MP. Multilevel analysis of self-perception in oral health and associated  
311 factors in Southern Brazilian adults: a cross-sectional study. *Cad Saúde*  
312 *Pública*. 2015 Jan; 31(1):49-59.
- 313 10. Nogueira CMR, Falcão LMN, Nuto SAS, Saintrain MVL, Vieira-Meyer  
314 APGF. Autopercepção de saúde bucal em idosos: estudo de base  
315 domiciliar. *Rev Bras Geriatr Gerontol*. 2017; 20(1): 7-19.
- 316 11. Solemdal K, Sandvik L, Willumsen T, Mowe M, Hummel T. The Impact of  
317 Oral Health on Taste Ability in Acutely Hospitalized Elderly. *PLoS ONE*.  
318 2012 May; 7(5). Doi: 10.1371/journal.pone.0036557.
- 319 12. Felício CM, Cunha CC. Relações entre condições miofuncionais orais e  
320 adaptações de próteses totais. *PCL: Rev Ibero-Am Protese Clin Lab*.  
321 2005; 7(36):195-202.
- 322 13. Martins AM, Jones KM, Souza JG, Pordeus IA. Association between  
323 physical and psychosocial impacts of oral disorders and quality of life  
324 among the elderly. *Cien Saude Colet*. 2014 Aug; 19(8):3461-3478.
- 325 14. Andradea NB, Canona MBF, Zugmanb CL, Ayresb TG, Ideb MG,  
326 Novelllic MPC. Centro de convivência de idosos: uma abordagem de  
327 estimulação cognitiva e psicossocial. *Cad Ter Ocup UFSCar*. 2014;  
328 22(1):121-128. Available from: <http://dx.doi.org/10.4322/cto.2014.013>.
- 329 15. Palma PV, Caetano PL, Leite IC. Impact of Periodontal Diseases on

330 Health-Related Quality of Life of Users of the Brazilian Unified Health  
331 System. *I Int J Dent.* 2013;2013:150357. doi: 10.1155/2013/150357.

332 16. Duque-Duque V, Tamayo-Castrillón J, Echeverri-Cadavid P, Gutiérrez-  
333 Osorio AY, Sepúlveda-Correa D, Giraldo-Ramírez O, et al. Calidad de  
334 vida relacionada con la salud bucal en adultos mayores que consultan a  
335 la IPS Universitaria de Medellín y sus factores asociados. *Rev CES*  
336 *Odont.* 2013; 26(1):10-23.

337

338

339
